# Supplementary material
Source: PubMed Central journal article supplement (PMC3119306)

**MMTV-Cre;NRP2<sup>loxP/loxP</sup>**

**MMTV-Cre;NRP2<sup>+/loxP</sup>**

**MMTV-Cre;NRP2<sup>+/+</sup>**

**5**

**7**

**9**

**12**

**Age (Weeks)**

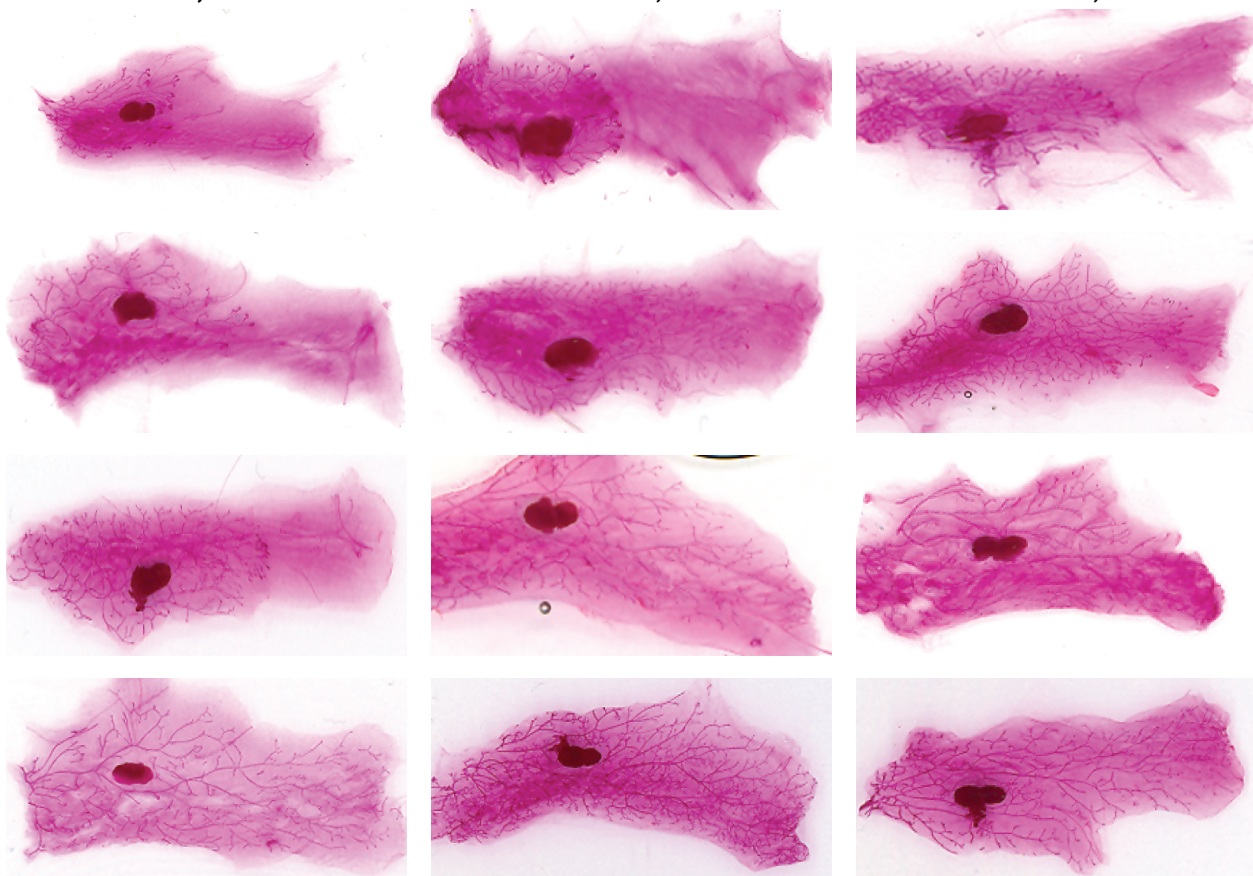

Supplement: supp_138.14.2969_DEV051318FigS1.pdf [file supp_138.14.2969_DEV051318FigS1.pdf]

**A.**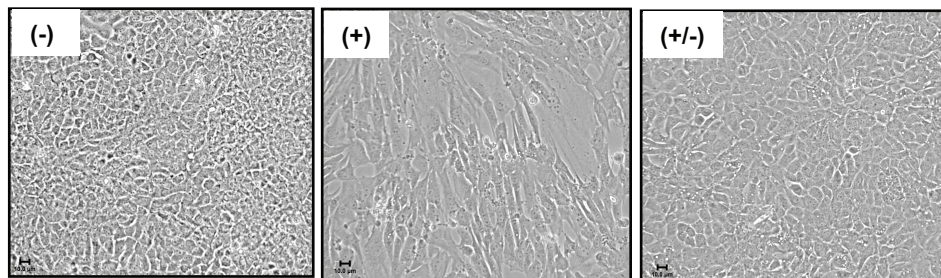**B.**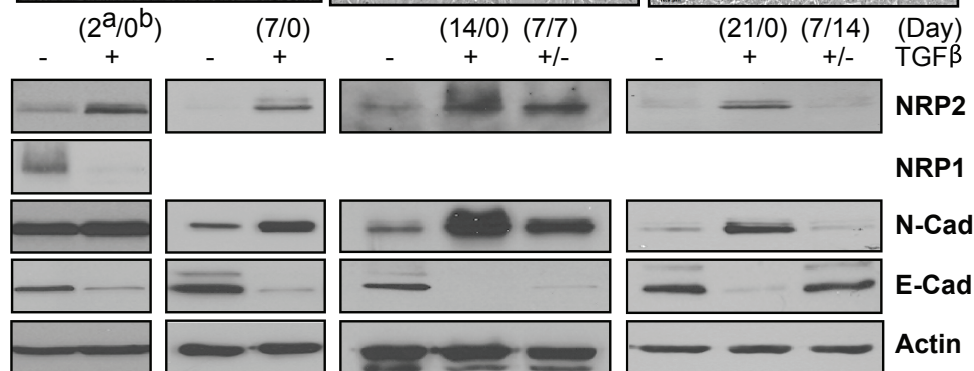**C.**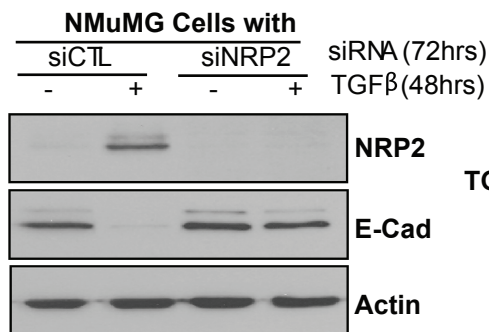**D.**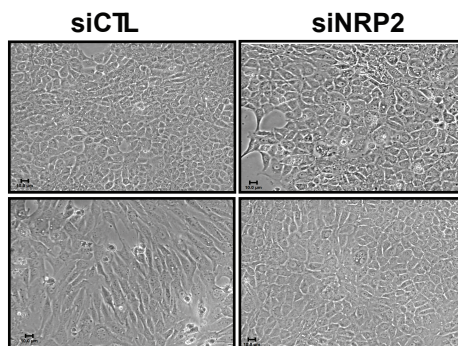**E.**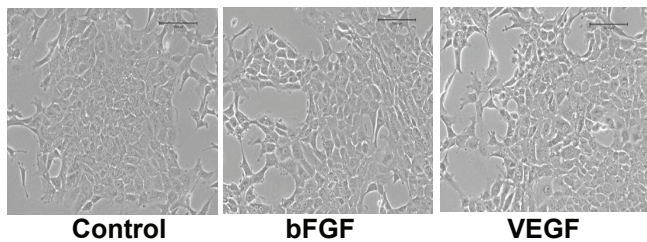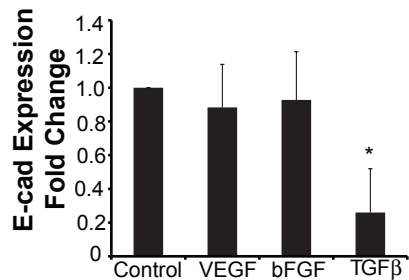

Supplement: supp_138.14.2969_DEV051318FigS2.pdf [file supp_138.14.2969_DEV051318FigS2.pdf]

**MMTV-Cre;NRP2<sup>+/+</sup>**

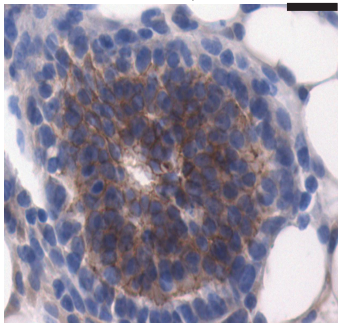

**MMTV-Cre;NRP2<sup>+/loxP</sup>**

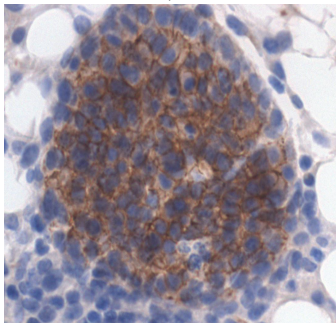

**MMTV-Cre;NRP2<sup>loxP/loxP</sup>**

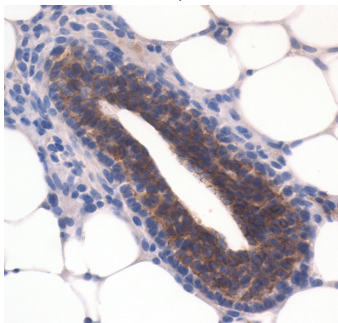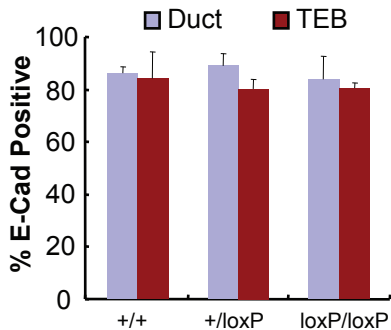

Supplement: supp_138.14.2969_DEV051318FigS3.pdf [file supp_138.14.2969_DEV051318FigS3.pdf]
